# Supplementary material for: Distortion of double-stranded DNA structure by the binding of the restriction DNA glycosylase R.PabI
Source: PubMed Central journal article supplement (PMC7229829; doi:10.1093/nar/gkaa184), 2020-03-31
Supplement: gkaa184_supplemental_file.pdf [file gkaa184_supplemental_file.pdf]

1 **Supplementary Materials**

2

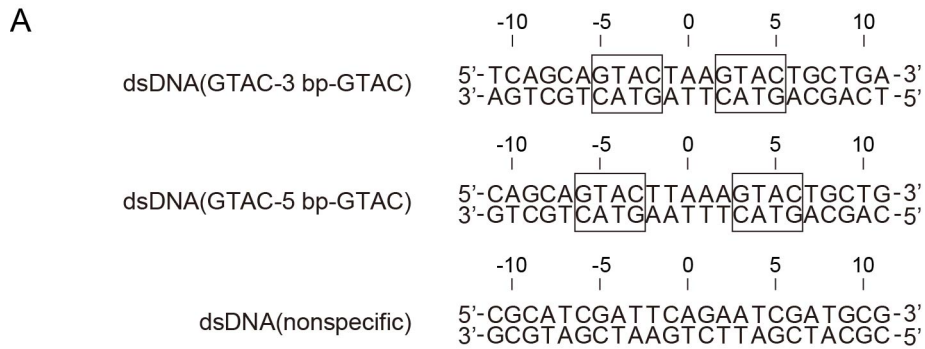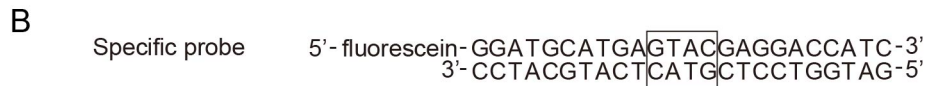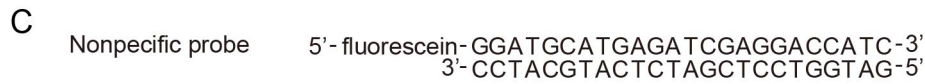

3

4

5 Supplementary Figure 1. dsDNA sequences used in this study. (A) dsDNA sequences (23 bp) used for  
 6 cocrystallization assays. The R.PabI recognition sequence (5'-GTAC-3') is indicated by boxes. (B) A  
 7 dsDNA sequence (24 bp) used for the DNA glycosylase activity assay and the EMSA (the specific  
 8 probe). (C) A dsDNA sequence (24 bp) used for the EMSA (the nonspecific probe).

9

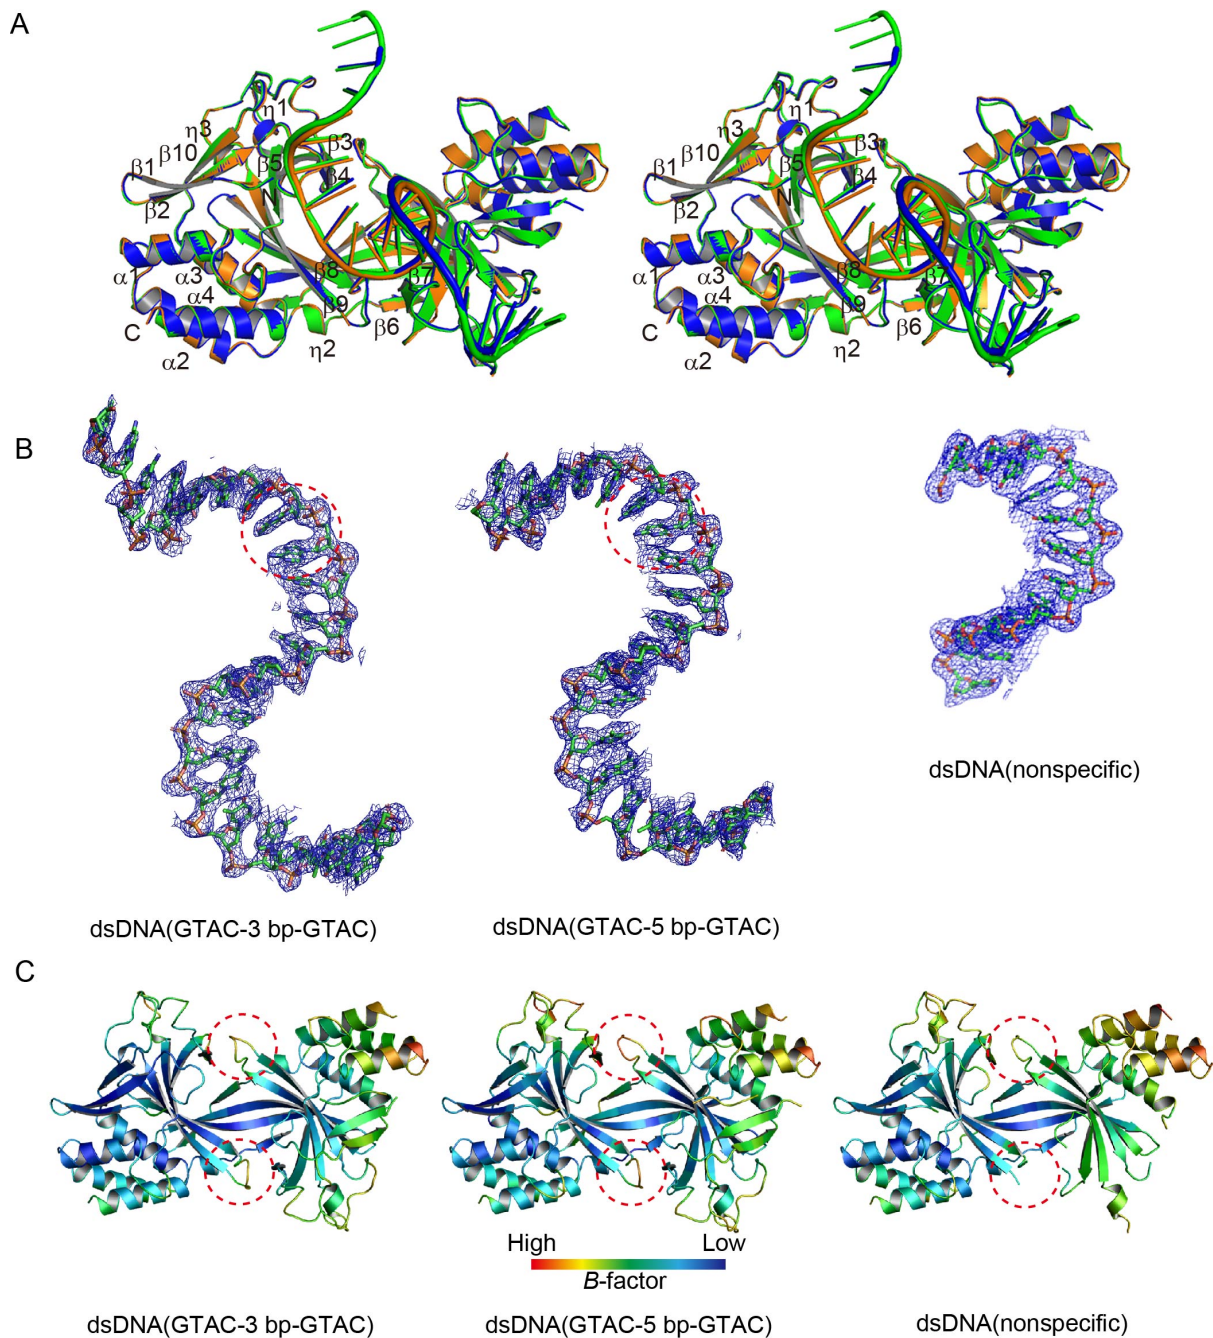

Supplementary Figure 2. Structure determination of the R.PabI(Y68F-K154A)-dsDNA complexes. (A) The stereo diagram of the superposition of the R.PabI(Y68F-K154A)-dsDNA complexes in the asymmetric units; green, the dsDNA(GTAC-3 bp-GTAC) complex; blue, the dsDNA(GTAC-5 bp-GTAC) complex; orange, the dsDNA(nonspecific) complex. Secondary structure assignments are labelled on the model. (B) The structure of DNA in each complex is shown in stick model. The composite omit map (sigma-A weighted  $2F_o - F_c$ ,  $1 \sigma$ ) is shown in blue mesh. The positions at which base-pair stacking is distorted are indicated by red dotted circles. (C) Temperature factors of R.PabI dimers in the R.PabI(Y68F-K154A)-dsDNA complexes. The positions of the  $\beta 8$ - $\beta 9$  loop are indicated by red dotted circles.

A

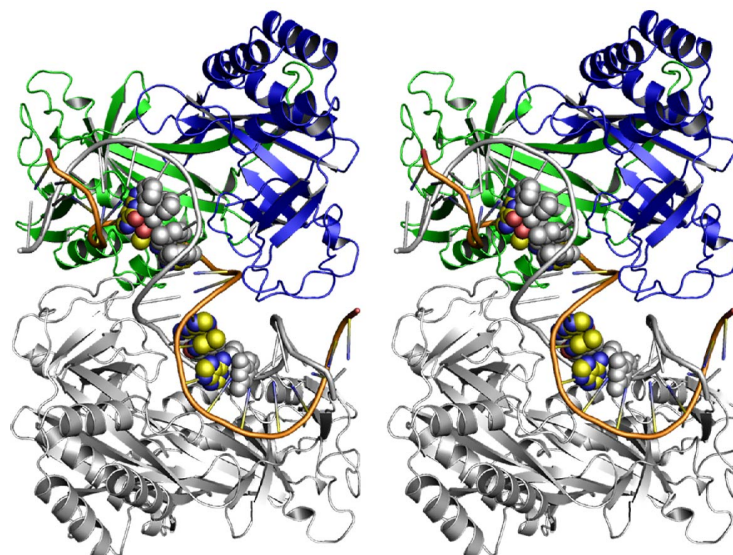

dsDNA(GTAC-3 bp-GTAC)

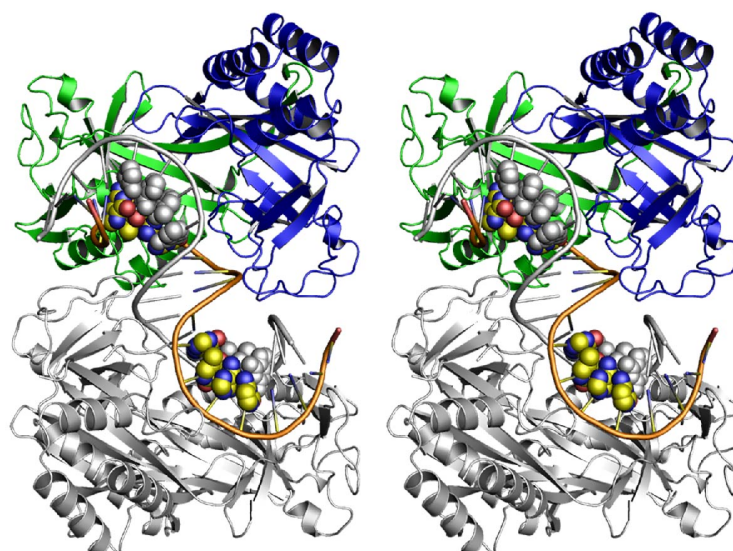

dsDNA(GTAC-5 bp-GTAC)

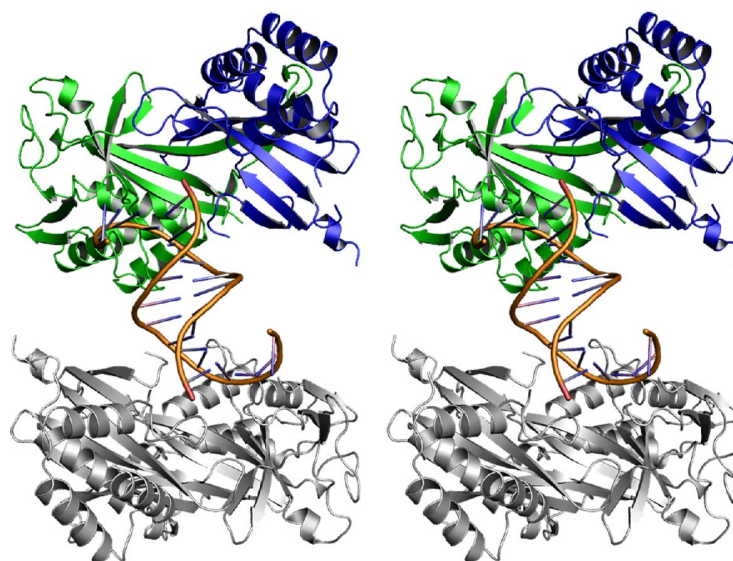

dsDNA(nonspecific)

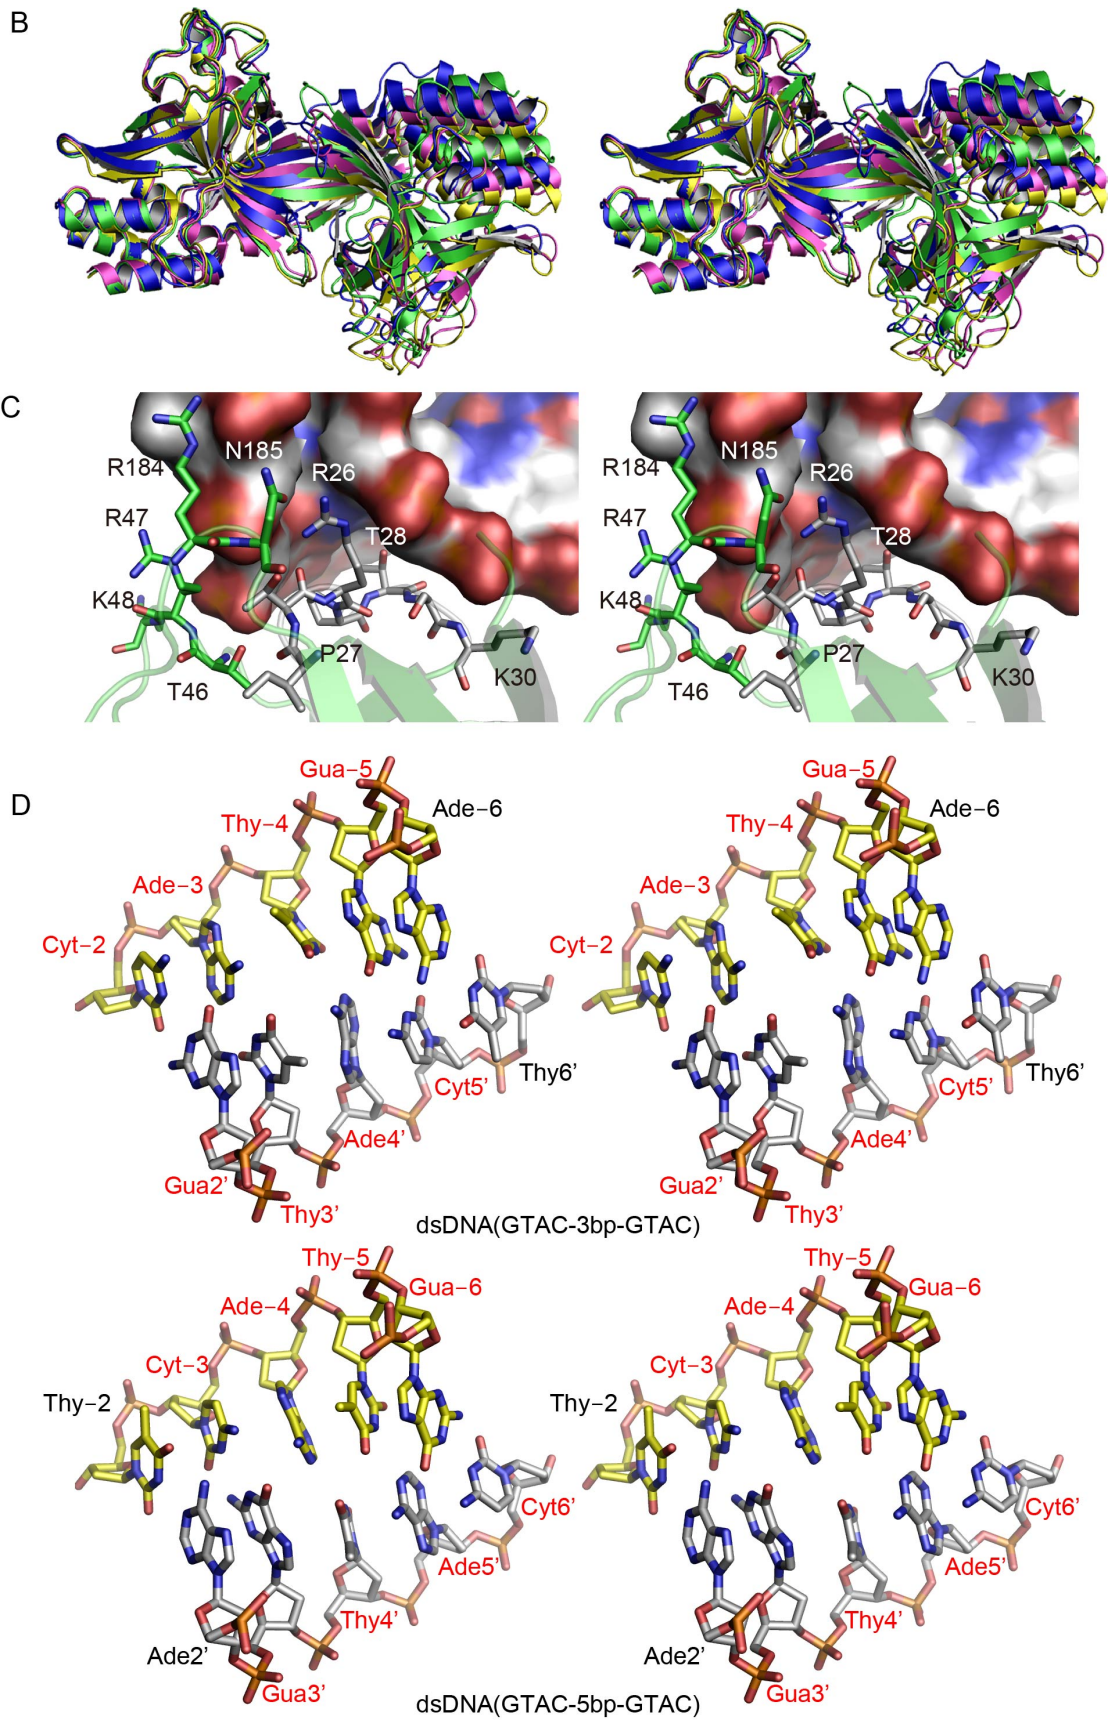

1  
2  
3  
4

Supplementary Figure 3. Stereo diagrams. (A) Stereo diagrams of Figure 2A. (B) Stereo diagram of Figure 3A. (C) Stereo diagram of Figure 4D. (D) Stereo diagrams of Figure 5A.

1

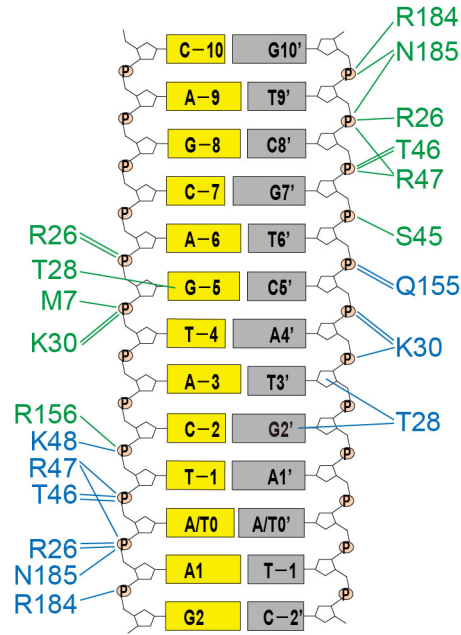

2

3

4 Supplementary Figure 4. dsDNA(GTAC-3 bp-GTAC) recognition by the R.PabI(Y68F-K154A) mutant.

5 Residues of chains A and B are shown in green and blue texts, respectively. Intermolecular hydrogen

6 bonds between R.PabI and dsDNA are shown in green (R.PabI chain A-dsDNA) and blue (R.PabI

7 chain B-dsDNA) lines.

8

1  
2

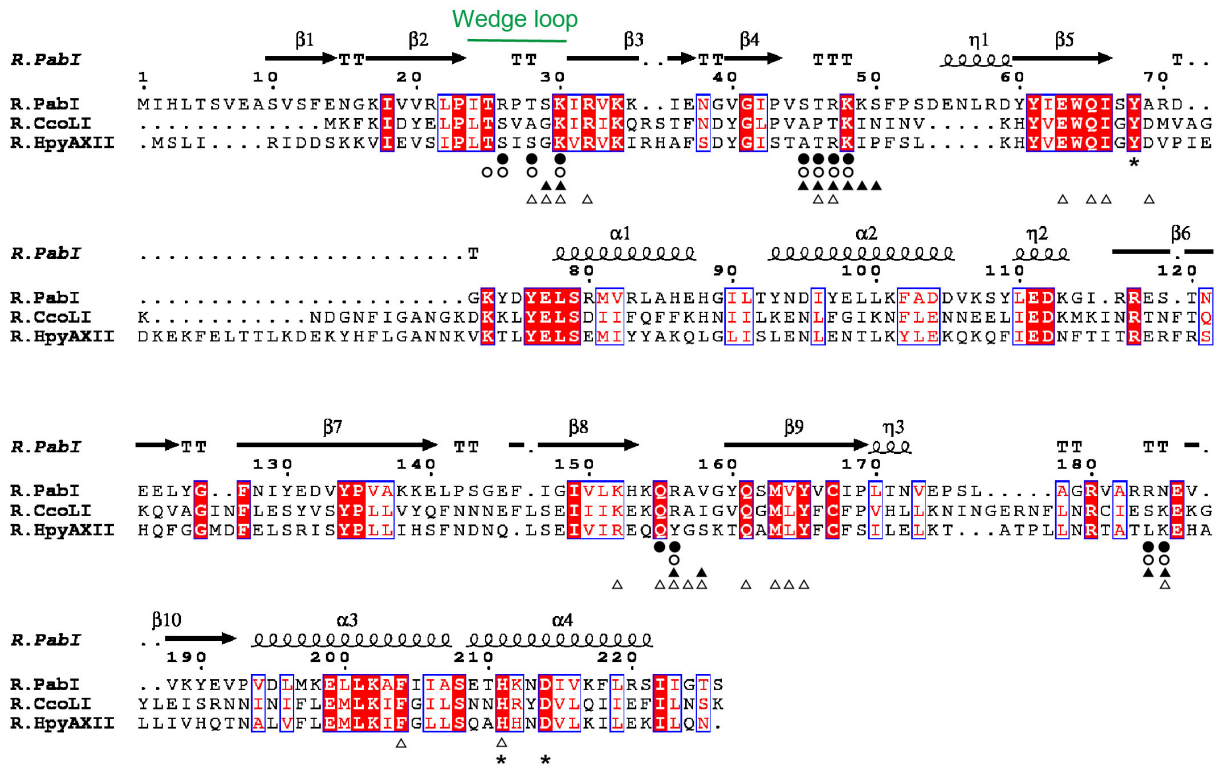

3  
4  
5  
6  
7  
8  
9  
10  
11  
12  
13  
14

Supplementary Figure 5. Amino acid sequence alignments of R.PabI homologues (R.CcoLI from *Campylobacter coli*, WP\_002830209; R.HpyAXII from *Helicobacter pylori*, ACI43084.1). Invariant residues are highlighted with red boxes, and conserved residues are shown in red text. Residues that form hydrogen bonds with DNA in the dsDNA(GTAC-3 bp-GTAC) and dsDNA(GTAC-5 bp-GTAC) complexes are marked with black and open circles, respectively. Residues that form hydrogen bonds in the sequence-nonspecific dsDNA-binding state (PDB ID: 5IFF) and the product dsDNA-binding state (PDB ID: 3WAZ) are marked with black and open triangles, respectively. The catalytic residues are marked with asterisks. The secondary structure of R.PabI in the dsDNA(GTAC-5 bp-GTAC) complex is indicated by helices ( $\alpha$  and  $3_{10}$  ( $\eta$ ) helices), arrows ( $\beta$  strands) and TT ( $\beta$ -turn).

1  
2

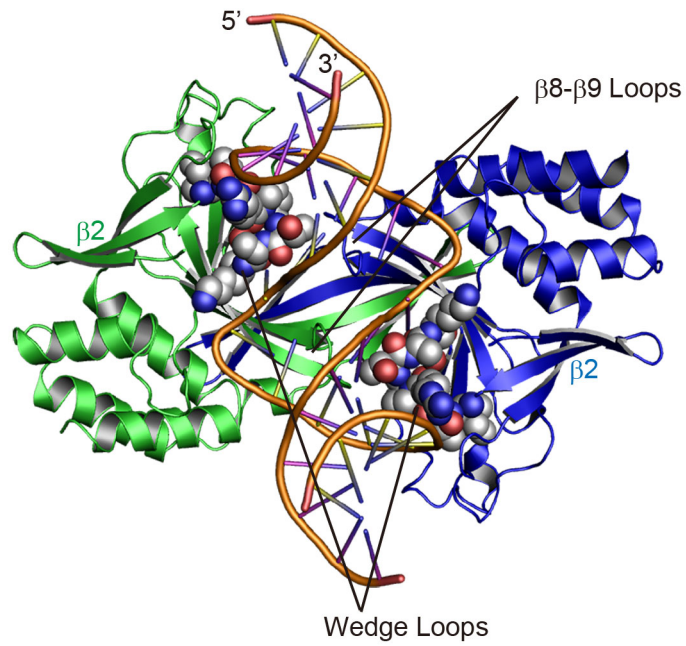

3  
4  
5  
6  
7  
8  
9  
10

Supplementary Figure 6. Wedge loops in the R.PabI-product dsDNA complex (PDB ID: 3WAZ). The R.PabI dimer is coloured green (chain A) and blue (chain B). The bound dsDNA is coloured orange. Residues in the wedge loop are shown in sphere models. The positions of the  $\beta 8-\beta 9$  loop, which is utilized for base flipping, are also indicated.

1  
2

Table S1. Hydrogen bonds between R.PabI(Y68F-K154A) and dsDNA(GTAC-5 bp-GTAC)

| Protein  |         |            | H-bonds   |              | DNA      |        |               |           |
|----------|---------|------------|-----------|--------------|----------|--------|---------------|-----------|
| Chain ID | Residue | Main/Side* | Atom Name | Distance (Å) | Chain ID | Base   | Base/Backbone | Atom Name |
| A        | M7      | Main       | N         | 2.63         | C        | Ade-4  | Backbone      | OP1       |
| A        | R26     | Side       | NE        | 3.10         | C        | Gua-6  | Backbone      | O3'       |
| A        | R26     | Side       | NE        | 3.28         | C        | Thy-5  | Backbone      | OP2       |
| A        | T28     | Side       | OG1       | 2.72         | C        | Thy-5  | Base          | O2        |
| A        | K30     | Main       | N         | 3.35         | C        | Ade-4  | Backbone      | OP2       |
| B        | R26     | Side       | NH1       | 3.33         | C        | Ade0   | Backbone      | O3'       |
| B        | R26     | Side       | NH1       | 3.26         | C        | Ade1   | Backbone      | OP2       |
| B        | T46     | Main       | N         | 2.78         | C        | Ade0   | Backbone      | OP2       |
| B        | T46     | Side       | OG1       | 3.31         | C        | Ade0   | Backbone      | OP2       |
| B        | R47     | Main       | N         | 3.35         | C        | Ade0   | Backbone      | OP2       |
| B        | R184    | Side       | NH1       | 3.64         | C        | Ade2   | Backbone      | OP2       |
| B        | N185    | Main       | N         | 2.70         | C        | Ade1   | Backbone      | OP2       |
| A        | T25     | Side       | OG1       | 2.81         | C'       | Cyt9'  | Backbone      | OP1       |
| A        | R26     | Side       | NH1       | 3.75         | C'       | Gua8'  | Backbone      | O3'       |
| A        | R26     | Side       | NH1       | 3.44         | C'       | Cyt9'  | Backbone      | OP1       |
| A        | S45     | Side       | OG        | 3.58         | C'       | Thy7'  | Backbone      | O5'       |
| A        | T46     | Main       | N         | 3.12         | C'       | Gua8'  | Backbone      | OP1       |
| A        | T46     | Side       | OG1       | 3.58         | C'       | Gua8'  | Backbone      | OP1       |
| A        | R47     | Main       | N         | 3.63         | C'       | Gua8'  | Backbone      | OP1       |
| A        | R47     | Main       | N         | 3.49         | C'       | Gua8'  | Backbone      | OP2       |
| A        | R47     | Side       | NE        | 3.06         | C'       | Cyt9'  | Backbone      | OP2       |
| A        | K48     | Main       | N         | 3.72         | C'       | Gua8'  | Backbone      | OP2       |
| A        | R184    | Side       | NE        | 2.71         | C'       | Thy10' | Backbone      | OP2       |
| A        | R184    | Side       | NH2       | 2.53         | C'       | Thy10' | Backbone      | OP2       |
| A        | N185    | Main       | N         | 2.85         | C'       | Cyt9'  | Backbone      | OP1       |
| A        | N185    | Side       | ND2       | 3.21         | C'       | Thy10' | Backbone      | OP2       |
| B        | M7      | Main       | N         | 2.94         | C'       | Thy4'  | Backbone      | OP2       |
| B        | M7      | Main       | N         | 3.83         | C'       | Gua3'  | Backbone      | O5'       |
| B        | T28     | Side       | OG1       | 3.04         | C'       | Gua3'  | Backbone      | O4'       |
| B        | K30     | Main       | N         | 3.53         | C'       | Thy4'  | Backbone      | OP1       |
| B        | R156    | Side       | NE        | 3.67         | C'       | Cyt6'  | Backbone      | O3'       |

DNA bases of the symmetrically related molecule are indicated by a prime.

\*Main, main chain; Side, side chain.

3  
4



1  
2

Table S2. Hydrogen bonds between R.PabI(Y68F-K154A) and dsDNA(GTAC-3 bp-GTAC)

| Protein  |         |            |           | H-bonds      | DNA      |        |               |           |
|----------|---------|------------|-----------|--------------|----------|--------|---------------|-----------|
| Chain ID | Residue | Main/Side* | Atom Name | Distance (Å) | Chain ID | Base   | Base/Backbone | Atom Name |
| A        | M7      | Main       | N         | 2.88         | C        | Thy-4  | Backbone      | OP1       |
| A        | R26     | Side       | NE        | 3.24         | C        | Ade-6  | Backbone      | O3'       |
| A        | R26     | Side       | NE        | 3.34         | C        | Gua-5  | Backbone      | OP2       |
| A        | T28     | Side       | OG1       | 3.29         | C        | Gua-5  | Base          | N2        |
| A        | K30     | Main       | N         | 3.31         | C        | Thy-4  | Backbone      | OP2       |
| A        | K30     | Side       | NZ        | 2.84         | C        | Thy-4  | Backbone      | OP2       |
| A        | R156    | Side       | NE        | 3.32         | C        | Cyt-2  | Backbone      | O3'       |
| B        | R26     | Side       | NH2       | 3.29         | C        | Ade0   | Backbone      | O3'       |
| B        | R26     | Side       | NH2       | 2.82         | C        | Ade1   | Backbone      | OP2       |
| B        | T46     | Main       | N         | 2.93         | C        | Ade0   | Backbone      | OP2       |
| B        | T46     | Side       | OG1       | 3.52         | C        | Ade0   | Backbone      | OP2       |
| B        | R47     | Main       | N         | 3.75         | C        | Ade0   | Backbone      | OP2       |
| B        | R47     | Side       | NE        | 3.49         | C        | Ade1   | Backbone      | OP1       |
| B        | K48     | Side       | NZ        | 3.85         | C        | Thy-1  | Backbone      | O5'       |
| B        | R184    | Side       | NH1       | 2.27         | C        | Gua2   | Backbone      | OP2       |
| B        | N185    | Main       | N         | 2.91         | C        | Ade1   | Backbone      | OP2       |
| A        | R26     | Side       | NH1       | 3.30         | C'       | Thy9'  | Backbone      | OP1       |
| A        | S45     | Side       | OG        | 3.89         | C'       | Gua7'  | Backbone      | O5'       |
| A        | T46     | Main       | N         | 3.39         | C'       | Cyt8'  | Backbone      | OP1       |
| A        | T46     | Side       | OG1       | 3.77         | C'       | Cyt8'  | Backbone      | OP1       |
| A        | R47     | Main       | N         | 3.45         | C'       | Cyt8'  | Backbone      | OP1       |
| A        | R47     | Side       | NE        | 2.93         | C'       | Thy9'  | Backbone      | OP2       |
| A        | R184    | Side       | NH1       | 3.09         | C'       | Gua10' | Backbone      | OP2       |
| A        | N185    | Main       | N         | 3.28         | C'       | Thy9'  | Backbone      | OP1       |
| A        | N185    | Side       | ND2       | 3.25         | C'       | Gua10' | Backbone      | OP2       |
| B        | T28     | Side       | OG1       | 3.82         | C'       | Gua2'  | Base          | N2        |
| B        | T28     | Side       | OG1       | 2.85         | C'       | Thy3'  | Backbone      | O4'       |
| B        | K30     | Main       | N         | 3.81         | C'       | Ade4'  | Backbone      | OP1       |
| B        | K30     | Side       | NZ        | 2.72         | C'       | Cyt5'  | Backbone      | OP1       |
| B        | K30     | Side       | NZ        | 3.22         | C'       | Ade4'  | Backbone      | O3'       |
| B        | Q155    | Side       | NE2       | 2.66         | C'       | Thy6'  | Backbone      | OP1       |
| B        | Q155    | Side       | NE2       | 3.58         | C'       | Cyt5'  | Backbone      | O3'       |

DNA bases of the symmetrically related molecule are indicated by a prime.

\*Main, main chain; Side, side chain.

3  
4
